# Supplementary material
Source: publisher site journal article supplement (https://www.spandidos-publications.com/8485/downloadSupplementary)
Supplement: Supplementary file 1 [file downloadSupplementary]

Table SI. Accession numbers of *Mycobacterium* species and subspecies used.

| Species/subspecies identity | Accession numbers       | (Refs.) |
|-----------------------------|-------------------------|---------|
| MAB- isolate 1              | SRR14043053             | (19)    |
| MAB-isolate 2               | SRR14043043             |         |
| MAB-isolate 3               | SRR14043035             |         |
| MAB-isolate 4               | SRR14043008             |         |
| MAB-isolate 5               | SRR14043007             |         |
| MMAS-isolate 1              | SRR14043059             |         |
| MMAS-isolate 2              | SRR14043004             |         |
| MMAS-isolate 3              | Identified by MALDI-TOF |         |
| MMAS-isolate 4              | SRR14043045             |         |
| MMAS-isolate 5              | SRR14043031             |         |
| MTB-H37Ra (ATCC 25177)      | CP000611                | (22)    |

The data from these databases are now available in the European Nucleotide Archive. NTM datasets are accessible under BioProject accession PRJNA523980 (<https://www.ebi.ac.uk/ena/browser/view/PRJNA523980>), whereas MTB-H37Ra data is available under PRJNA18883 (<https://www.ebi.ac.uk/ena/browser/view/PRJNA18883>). MAB, *Mycobacterium abscessus* subspecies *abscessus*; MMAS, *Mycobacterium abscessus* subspecies *massiliense*; MTB-H37Ra, *Mycobacterium tuberculosis*-H37Ra; MALDI-TOF, matrix-assisted laser desorption/ionization-time of flight; NTM, nontuberculous mycobacteria.

Table SII. Specific DNA-related Raman shifts and their corresponding peak assignments.

| Raman shift (cm <sup>-1</sup> ) | Peak assignments                                | (Refs.)          |
|---------------------------------|-------------------------------------------------|------------------|
| 726                             | Adenine (ring breathing mode)                   | (26-32)          |
| 755                             | Thymine (ring breathing mode)                   | (27,32)          |
| 781                             | Thymine/Cytosine (ring breathing mode)          | (26-28,30-35)    |
| 1,097                           | Asymmetric stretching mode (O-P-O) <sup>-</sup> | (26-28,33)       |
| 1,317                           | Guanine (C-N stretching mode)                   | (27,28)          |
| 1,331                           | Adenine/Guanine                                 | (26-28,32)       |
| 1,486                           | Guanine/Adenine                                 | (26-28)          |
| 1,577                           | Guanine/Adenine                                 | (26-28,33,36,37) |

Table SIII. Reproducibility assessment of SERS spectra via Pearson's and Spearman's correlation analysis.

| Isolates                | R <sup>2</sup><br>(Repeat 1) | R <sup>2</sup><br>(Repeat 2) | R <sup>2</sup><br>(Repeat 3) | Pearson's r<br>(Mean ± SD) | Spearman's ρ<br>(Mean ± SD) |
|-------------------------|------------------------------|------------------------------|------------------------------|----------------------------|-----------------------------|
| A, At 15 ng/μl (785 nm) |                              |                              |                              |                            |                             |
| MAB-isolate 1           | 0.8484                       | 0.8402                       | 0.8399                       | 0.91 ± 0.01                | 0.86±0.01                   |
| MAB-isolate 2           | 0.9005                       | 0.8830                       | 0.8716                       | 0.92±0.01                  | 0.87±0.01                   |
| MAB-isolate 3           | 0.8753                       | 0.8669                       | 0.8698                       | 0.91±0.02                  | 0.86±0.02                   |
| MAB-isolate 4           | 0.7701                       | 0.7651                       | 0.7692                       | 0.91±0.01                  | 0.76±0.01                   |
| MAB-isolate 5           | 0.8067                       | 0.7947                       | 0.8099                       | 0.93±0.01                  | 0.86±0.01                   |
| MMAS-isolate 1          | 0.8408                       | 0.8156                       | 0.8169                       | 0.92±0.01                  | 0.86±0.02                   |
| MMAS-isolate 2          | 0.8811                       | 0.8764                       | 0.8745                       | 0.92±0.01                  | 0.88±0.01                   |
| MMAS-isolate 3          | 0.8710                       | 0.8711                       | 0.8703                       | 0.91±0.01                  | 0.83±0.02                   |
| MMAS-isolate 4          | 0.8176                       | 0.8193                       | 0.8303                       | 0.91±0.00                  | 0.80±0.01                   |
| MMAS-isolate 5          | 0.8047                       | 0.7838                       | 0.8217                       | 0.88±0.05                  | 0.81±0.05                   |
| MTB-H37Ra               | 0.8144                       | 0.7848                       | 0.8370                       | 0.86±0.11                  | 0.81±0.05                   |
| B, At 50 ng/μl (785 nm) |                              |                              |                              |                            |                             |
| MAB-isolate 1           | 0.8334                       | 0.8217                       | 0.8074                       | 0.90±0.02                  | 0.84±0.03                   |
| MAB-isolate 2           | 0.8891                       | 0.8853                       | 0.8709                       | 0.94±0.02                  | 0.87±0.04                   |
| MAB-isolate 3           | 0.8645                       | 0.8561                       | 0.8555                       | 0.92±0.01                  | 0.84±0.01                   |
| MAB-isolate 4           | 0.8289                       | 0.8552                       | 0.8503                       | 0.94±0.00                  | 0.84±0.01                   |
| MAB-isolate 5           | 0.8282                       | 0.8634                       | 0.8526                       | 0.92±0.02                  | 0.79±0.02                   |
| MMAS-isolate 1          | 0.9045                       | 0.8998                       | 0.8967                       | 0.92±0.01                  | 0.83±0.03                   |
| MMAS-isolate 2          | 0.9014                       | 0.9005                       | 0.9020                       | 0.92±0.01                  | 0.82±0.02                   |
| MMAS-isolate 3          | 0.8633                       | 0.8448                       | 0.8792                       | 0.90±0.04                  | 0.80±0.02                   |
| MMAS-isolate 4          | 0.7910                       | 0.8177                       | 0.8451                       | 0.89±0.05                  | 0.82±0.04                   |
| MMAS-isolate 5          | 0.8813                       | 0.8563                       | 0.8659                       | 0.91±0.04                  | 0.85±0.05                   |
| MTB-H37Ra               | 0.9170                       | 0.9160                       | 0.9143                       | 0.92±0.02                  | 0.83±0.02                   |

MAB, *Mycobacterium abscessus* subspecies *abscessus*; MMAS, *Mycobacterium abscessus* subspecies *massiliense*; MTB-H37Ra, *Mycobacterium tuberculosis*-H37Ra; R<sup>2</sup>, the coefficient of determination; SD, standard deviation.
